# Supplementary material for: The influence of gaze direction on time perception: From the perspective of social perception
Source: Front Psychol. 2023 Jan 25;13:967603. doi: 10.3389/fpsyg.2022.967603 (PMC9907083; doi:10.3389/fpsyg.2022.967603)
Supplement: Supplementary file 1 [file Table_1.XLS]

## Sheet: Bisection Point
No.	Gender	Age	own_race_direct	own_race_right 45°	own_race_left 45°	other_race_direct	other_race_right 45°	other_race_left 45°	a1b1	a1b2	a2b1	a2b2			a1b1: own-race-direct
1	1	21	1125.44	1100	1225.23	1125.15	1100	1225.96	1125.44	1162.62	1125.15	1162.98			a1b2: own-race-averted
2	1	24	1005.81	1200.27	1151.05	1073.42	1125.15	1074.29	1005.81	1175.66	1073.42	1099.72			a2b1: other-race-direct
3	2	24	1262.33	1480.62	1472.63	1367.18	1363.7	1356.97	1262.33	1476.62	1367.18	1360.34			a2b2: other-race-averted
4	2	23	1128.2	1126.05	1154.35	1188.76	1186.24	1048.95	1128.2	1140.2	1188.76	1117.59
5	2	23	838.499	999.734	948.912	897.538	999.734	897.538	838.499	974.323	897.538	948.636
6	2	24	974.769	1049.4	974.769	1049.4	1100	1049.4	974.769	1012.08	1049.4	1074.7
7	2	28	920.433	1044.43	895.299	922.461	1155.57	972.998	920.433	969.863	922.461	1064.29
8	2	25	768.421	848.543	823.904	801.768	947.637	951.212	768.421	836.224	801.768	949.425
9	2	26	947.637	1048.95	1049.7	1023.95	1048.35	1100	947.637	1049.32	1023.95	1074.17
10	2	27	1125.24	1152.4	1100	1125.15	1176.05	1100	1125.24	1126.2	1125.15	1138.02
11	2	29	1207.69	1348.17	1276.09	1363.7	1230.22	1228.41	1207.69	1312.13	1363.7	1229.32
12	2	24	1201.54	1125.24	1127.54	1186.24	1200.76	1186.24	1201.54	1126.39	1186.24	1193.5
13	1	24	974.038	1100	1100	1024.72	999.734	1073.42	974.038	1100	1024.72	1036.58
14	2	24	1049.7	1151.05	972.998	1003.31	1151.05	1024.72	1049.7	1062.02	1003.31	1087.88
15	2	23	1225.23	1302.46	1235.05	1262.33	1203.99	1277.54	1225.23	1268.76	1262.33	1240.77
16	2	25	1150.6	1150.6	1285.47	1235.05	1256.33	1151.65	1150.6	1218.03	1235.05	1203.99
17	2	22	949.839	969.782	971.585	888.537	1017.92	974.769	949.839	970.683	888.537	996.344
18	2	24	1048.72	1225.23	1125.28	1153.3	1073.53	1100	1048.72	1175.26	1153.3	1086.77
19	2	22	1250.16	1273.46	1326.63	1259.07	1329.4	1262.33	1250.16	1300.05	1259.07	1295.87
20	2	24	1024.33	1049.4	1194.2	1024.47	1048.72	1049.7	1024.33	1121.8	1024.47	1049.21
21	2	23	1125.15	1125.44	1100	1180.4	1126.47	1203.99	1125.15	1112.72	1180.4	1165.23
22	1	23	1100	1003.31	1074.76	998.45	999.734	1074.85	1100	1039.04	998.45	1037.29
23	1	31	1048.95	937.669	1024.33	1100	1024.72	1049.68	1048.95	980.999	1100	1037.2
24	1	23	1049.68	1176.8	1049.7	1125.71	1074.29	1073.95	1049.68	1113.25	1125.71	1074.12
25	1	23	1074.85	1048.35	1100	1003.31	1198.45	1100	1074.85	1074.17	1003.31	1149.23
26	1	22	1046.7	1100	1125.15	1072.46	1232.42	1100	1046.7	1112.57	1072.46	1166.21
27	2	23	848.464	796.604	846.384	899.783	1024.72	848.543	848.464	821.494	899.783	936.629
28	2	24	945.899	1048.95	1182.08	1155.57	1215.86	1180.4	945.899	1115.52	1155.57	1198.13
29	2	24	1125.71	1176.05	1151.28	1024.47	1074.56	1023.2	1125.71	1163.66	1024.47	1048.88
30	2	24	949.839	1100	1023.2	1125.44	1262.33	1074.85	949.839	1061.6	1125.44	1168.59

## Sheet: Rating
No.	Age	Gender	own_f_at	own_r_at	own_l_at	other_f_at	other_r_at	other_l_at	own_f_v	own_r_v	own_l_v	other_f_v	other_r_v	other_l_v	own_f_ar	own_r_ar	own_l_ar	other_f_ar	other_r_ar	other_l_ar		f: front 0°, the direct gaze condititon
1	19	2	7.25	6.88	6.38	7.38	7.63	7.25	6.88	7.13	6.63	6.88	7	6.88	5.63	5.75	5.38	4.63	5.38	4.13		r: right 45°
2	23	2	5.88	5	5.63	5.13	5.13	5	6.25	5.63	6	5.88	6	5.75	5.63	5.38	5	4.75	4.63	4.63		l: left 45°
3	23	2	6.75	6.75	7	6.88	6.13	6.25	7.63	6.88	7.63	7.25	7	6.75	6.75	7	6.75	6	6.13	6.13		at: attractiveness
4	20	1	5.88	6.13	5.75	5.5	5.38	6.13	5.75	6	5.13	6	5.88	6	5.38	5	5.25	4.75	4.75	4.75		v: valence
5	21	2	3.88	3	3	2.88	3.5	4.13	3.75	3.13	3.13	3	3.75	4.13	3.75	3.25	3.5	3.13	3.63	4.38		ar: arousal
6	28	2	1.63	1.88	2	1.38	1.63	2	2.5	2.5	2.63	1.63	2.13	2.38	2.38	2.38	2.75	1.75	2.38	2.25
7	28	2	5.63	5.88	6	5.63	6	5.63	6.13	6.25	5.38	5.75	5.88	5.63	5.38	5.38	5.25	4.88	5.5	6.25
8	25	2	5.75	6.25	6.25	5.88	6	5.63	5.63	5.75	5.88	5.13	5.63	5.38	5.38	5.38	5	4.88	4.75	4.88
9	20	2	5	5.13	5.25	5.13	5.63	5.75	5	5.25	4.63	5.63	5.13	5	4.38	4.25	4.75	3.88	4.5	4.5
10	20	2	3.13	3	3	3.25	2.88	3.25	3.75	4.13	3.88	3.63	3.38	3.88	3.88	4	3.63	3.38	3.75	3.5
11	25	2	2.88	2.63	2.38	1.88	2.5	2.13	3.25	3.13	2.88	2	3.88	3	2.63	2.63	3	2.13	2.38	2.5
12	24	2	5.88	6.25	6.25	6.13	6	6.13	5.88	5.63	5.75	6.13	6.13	5.5	5.75	5.38	5.38	5.38	5	5.38
13	28	1	4.75	4	5.25	4.75	4.75	4.5	6.13	6.63	6.38	6.5	5.5	5.88	5.38	4.75	5.25	5	5.25	4.25
14	26	2	5.13	5.38	5.63	5.13	5	5.5	5.25	5	5.25	5.5	5	5.5	5.13	4.5	5	4.75	5.38	5.38
15	21	2	4.88	4.75	4.75	4.88	5.13	4.75	4.63	4.25	4	5.25	5	4.5	4.25	4	4.38	3.88	4	3.75
16	19	2	5.75	6.13	5.63	5.88	6.38	6.25	2.88	2.75	2.75	2.75	2.75	3	3.13	3.13	3	2.75	3.13	2.88
17	26	2	2.88	2.5	2.13	2.88	3.5	2.38	1.88	2.38	2	2	2.13	1.75	2.25	2	2	1.88	2.88	1.75
18	25	2	8	8.63	7.88	7.88	8.88	7.75	8	8.63	8.25	7.88	8.88	8	8	8.63	7.88	7.75	8.88	7.75
19	24	2	6.13	6.13	6.38	6	5.63	5.5	6.75	6.38	6	6.13	5.38	5.63	6.5	6.13	6	6.25	5.38	5.88
20	18	2	5.75	5.63	4.88	5.38	5.63	5.63	3.13	2.63	2.63	3.5	3	3.13	3.63	3	3.13	3.38	3.38	3.13
21	30	2	6.88	7	6.88	7	7	6.75	6.63	6.63	6.5	6.38	6.38	6.63	6.38	6.38	6.13	6.25	6.75	6.13
22	30	2	6.13	6.25	6.25	5.88	6	5.88	6	6	5.75	5.75	6	5.75	5.63	5.75	5.38	5.5	5.5	5.5
23	28	2	5.25	5.25	5	4.88	5.75	5.75	5	5.25	6.38	5.13	5.75	5.13	4.88	4.88	5.38	4.75	4.13	5.13
24	20	2	4.13	3.63	3.88	4.25	4.38	4.13	5	4.88	4.88	4.75	4.63	4.88	3.38	2.88	3.5	3.25	3.5	3.63
25	21	2	5.38	5.5	5.25	5.25	5.25	5.75	6.75	6.5	6.38	6.5	7	6.75	6.13	6.63	6.63	6.13	5.88	6.13
26	20	2	5.5	5.63	5.63	5.38	5.75	5.75	5.13	6	5.13	5	5.25	5.63	4.75	4.88	4.88	4.75	5	4.75
27	24	2	4.75	4.75	4.63	4.88	5.25	5.38	5	4.75	4.5	4.63	4.38	4.5	4.75	4.75	4.63	4.75	5.13	4.88
28	22	2	4.38	3.75	4.13	4.88	3.88	4.13	4	3.5	3.5	4.75	3.75	4.25	4.38	3.63	3.5	4.38	3.13	3.5
29	19	2	5	5.13	5.5	4.75	4.63	5	6.13	6.38	6.25	5	5.38	4.75	3.88	4.38	4.25	3.88	3.75	3.75
30	22	1	2.5	2.63	1.88	2.63	2.25	2.25	3.38	2.88	2.5	3.13	2.5	2.88	2.63	3	2.38	2.63	2.38	2.38
31	24	2	1.75	1.5	1.63	2	2	2.63	3.63	3.63	3.5	3.63	3.5	3.75	2	1.5	1.75	2	2	2.75
32	23	2	1.38	1.25	1.38	1.25	1.88	1.88	5	5	4.88	5	5	5	1.25	1.13	1.25	1.25	1.88	1.75
33	20	2	1	1	1	1	1	1	1	2.13	2	1.13	1	1	1	1	1	1	1	1
34	28	2	1	1	1	1	1	1	5	5	5	5	5	4.88	1	1	1	1	1	1
35	19	2	1	1.38	1.25	1.13	1.88	1.38	4.75	5	5.38	5	5	4.88	1	1.13	1.38	1	1.13	1.13
36	26	2	5.75	5.75	6.13	5.63	5.88	6.13	5.13	5.13	5.13	5.25	5.25	5.38	5.25	5.13	5	5.38	5.38	5.25
37	22	2	5.5	5.5	5.25	5.25	5	4.75	6.25	6.63	6	6.75	6.75	5.38	4.88	4.5	4.5	5	4.5	4.63
38	25	2	4.38	4.5	5.13	4.38	4.38	5.13	4.25	4.5	4.5	3.63	4	4.88	4.5	4.38	4.25	4.63	4.38	4.75
39	19	2	2.88	2.38	3.25	3.25	3.5	2.38	2.75	2.13	2.88	3.13	3.38	2.25	2.88	2.13	2.88	3	3.63	2.5
40	30	2	5.88	5.25	5.75	6	5.88	5.75	5.5	5.63	5.5	5.5	5.75	5.5	5.75	5.88	5.63	6	5.75	5.88
41	20	2	2.38	2.5	2.63	2.25	2.63	2.38	3	3.38	3.13	2.75	2.75	3.13	2.13	2.38	2.38	2.38	2.13	2.38
42	27	2	5.13	4.75	5.38	5	4.5	5.38	6	7.5	5.5	5.88	5.63	6.25	5.25	6	5.75	6.13	5.75	3.88
43	20	2	5.38	6.63	6.25	5.38	6	5.75	5.25	6	5.63	6.25	4.88	5.13	4.38	4.25	6	5.5	3.88	5
44	24	1	3.13	3.38	3.25	3.38	3.38	4	4.88	3.88	4.75	4.5	4.75	4.63	4.13	3.88	4	3.88	4.5	4.13
45	25	1	3.13	3.25	3.5	3.5	3.38	3.25	5	4.5	4.88	4.38	4.75	4.38	2	2.63	2.75	2.25	2.75	2.5
46	20	2	4.38	3.75	3.63	4.75	4.25	4.13	5.13	4.5	4.88	5.25	4.75	5.38	5	4.38	4.63	4.88	4.88	4.75
47	20	2	5.5	5.38	5.5	5.13	5	5.25	5.5	5.5	5.25	5.5	5.25	5.75	4.63	3.75	4.38	4.13	3.88	3.75
